# Supplementary material for: High-level expression of biologically active human follicle stimulating hormone in the Chinese hamster ovary cell line by a pair of tricistronic and monocistronic vectors
Source: PubMed Central journal article supplement (PMC6611665; doi:10.1371/journal.pone.0219434), 2019-07-05
Supplement: pone.0219434.s013.pdf [file pone.0219434.s013.pdf]

**S1 Table. Specific primers for sequencing, qPCR and PCR analysis of MCB gDNA**

| Name      | Primer sequence 5' to 3'       | Target                                                                                     |
|-----------|--------------------------------|--------------------------------------------------------------------------------------------|
| SQ-5CH6-F | GCC GCT GCT TCC TGT GAC        | p1.1 and p12 expression vectors                                                            |
| SQ-3CH1-R | ACA AAC AGT TCT GAG ACC G      |                                                                                            |
| IRESA rev | AGG TTT CCG GGC CCT CAC ATT G  | EMCV IRES                                                                                  |
| SQ-FA-F   | CAC GCT ACA GGA AAA CCC        | Human FSH alpha-chain ORF                                                                  |
| SQ-FA-R   | TCT TGG ACC TTA GTG GAG TG     |                                                                                            |
| SQ-FB-F   | GCC CAA AAT CCA GAA AAC        | Human FSH beta-chain ORF                                                                   |
| SQ-FB-R   | ACA ATC AGT GCT GTC GCT        |                                                                                            |
| RT-ID-F   | GCC ACA AGA TCT GCC ACC ATG    | Transgene region, including the attenuated EMCV IRES element and mouse <i>dhfr</i> gene    |
| RT-ID-R   | GTA GGT CTC CGT TCT TGC CAA TC |                                                                                            |
| RT-HYG-F  | TTC GGC TCC AAC AAT GTC        | Hygromycin B resistance gene from p1.2 expression vector (hygromycin B phosphotransferase) |
| RT-HYG-R  | GTC TGC TGC TCC ATA CAA G      |                                                                                            |
| RT-PPIB-F | GCA GGC AAA GAC ACC AAT G      | CHO peptidyl-prolyl isomerase B ( <i>PPIB</i> ) gene                                       |
| RT-PPIB-R | CTC CAC CTT CCT CAC TAC ATC    |                                                                                            |

F = forward primer; R = reverse primer. The RT-ID-F and RT-ID-R pair contains one primer to the IRES sequence of EMCV and the reverse primer to mouse dihydrofolate reductase gene region. Oligonucleotides were synthesized by Evrogen, JSC (Moscow, Russia).
